# Supplementary material for: Thalamo-cortical network hyperconnectivity in preclinical progranulin mutation carriers
Source: PubMed Central journal article supplement — Neuroimage Clin. 2019 Mar 16;22:101751. doi: 10.1016/j.nicl.2019.101751 (PMC6438992; doi:10.1016/j.nicl.2019.101751), 2019-03-16
Supplement: mmc1.pdf [file mmc1.pdf]

## Supplementary Materials

**Fig. S1. Schematic of subject selection.** We searched the UCSF database and identified 17 preclinical *GRN* carriers, all of whom had an MRI scan. A subset of 15 of these carriers also had a tf-fMRI scan.

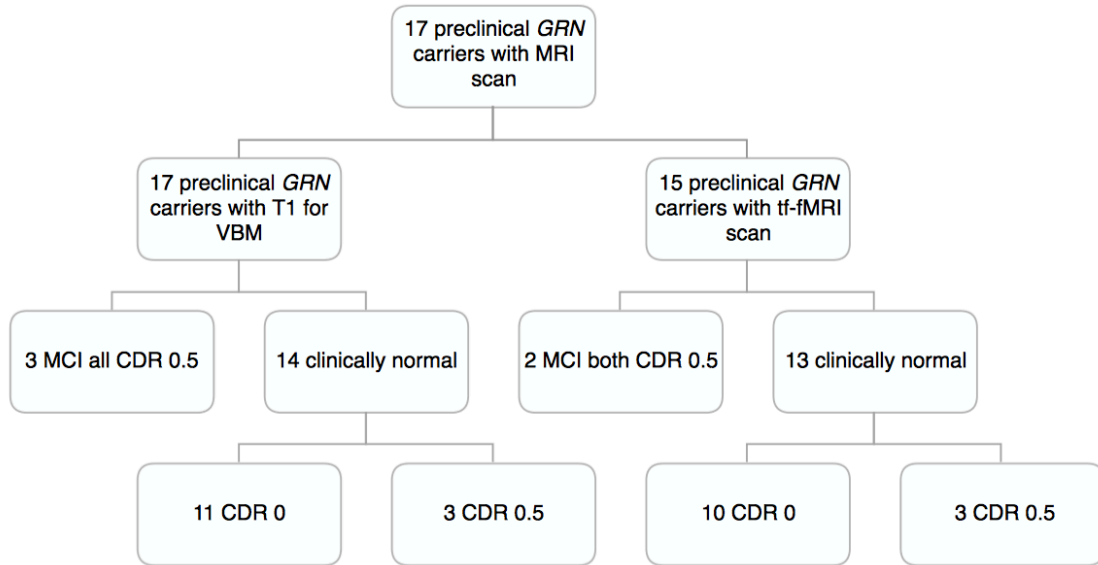

**Fig. S2. Asymmetry analysis schematic.** To compare connectivity symmetry, we took the left- and right-seeded thresholded maps from the *GRN* > HC comparison (Fig. 2), binarized the maps, then combined the maps into a union map of regions (green map). We then created the mirror image of this combined map (fuchsia map) and created a union map of all regions in the combined map and its mirror image (yellow map). We split the yellow map into left- (blue) and right- (red) sided regions within which mean connectivity w-scores were calculated for each ICN for each preclinical *GRN* subject.

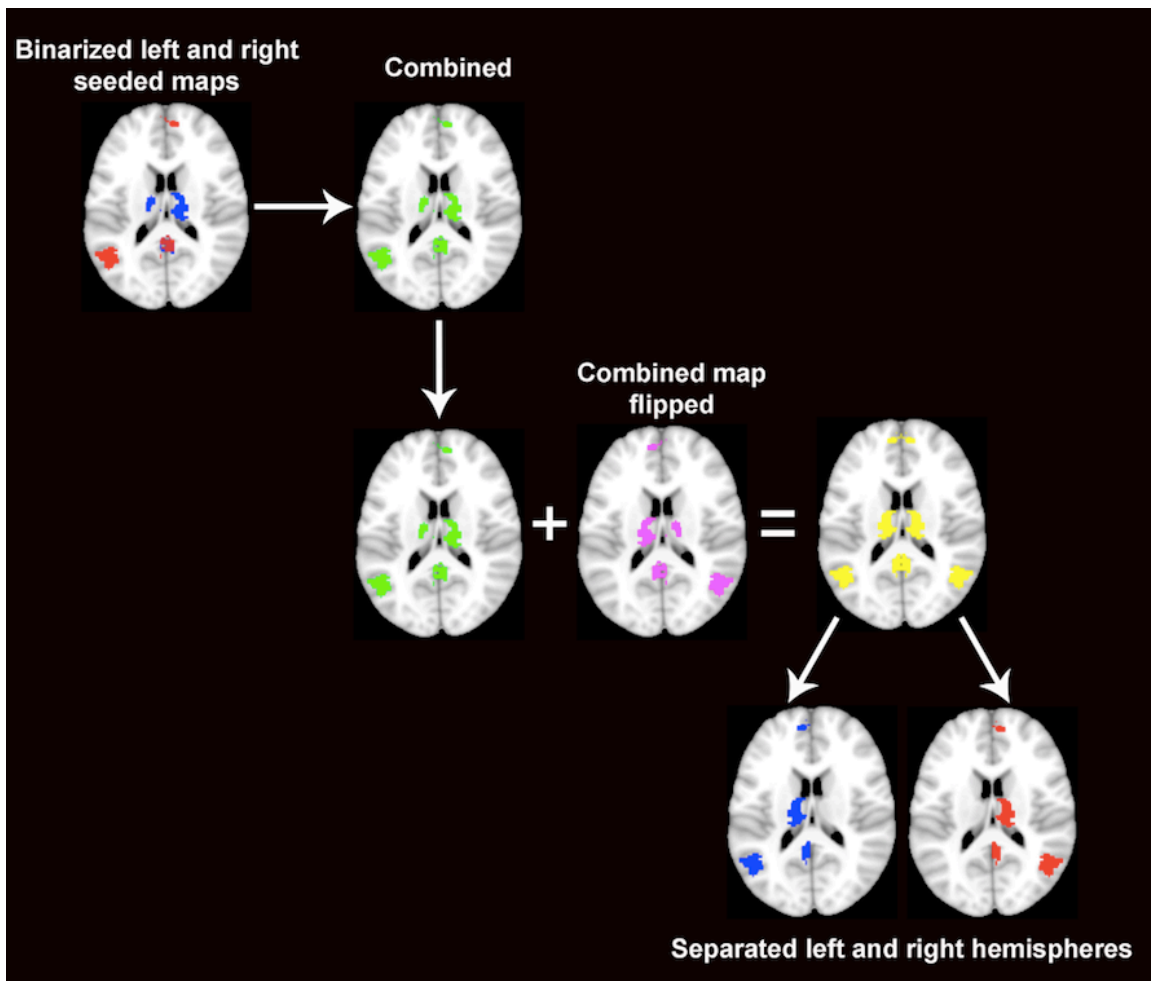

**Fig. S3. ICN alterations with 10 preclinical *GRN* subjects with CDR total score of 0.** Group difference maps show that widespread regions of increased intrinsic connectivity remain in 10 preclinical *GRN* compared with HC for all four networks studied. Left-seeded (yellow) and right-seeded (red) ICN increases generally overlapped (orange). Analyses were thresholded using joint probability distribution thresholding with a joint height and extent threshold of  $p < 0.05$  corrected for multiple comparisons. Color bars represent t- scores, and statistical maps are on the Montreal Neurological Institute template brain. The left side of the axial and coronal images corresponds to the left side of the brain.

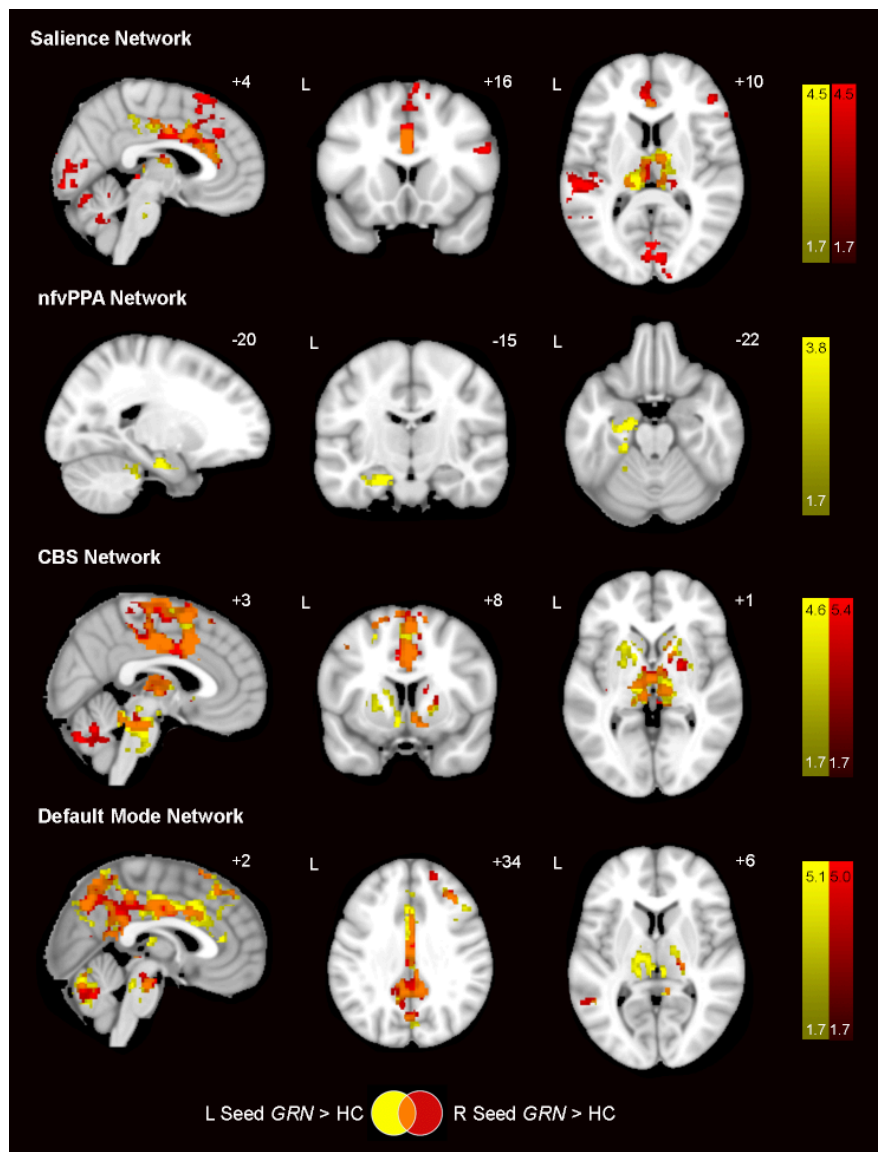

**Fig. S4. ICN connectivity changes associated with increasing age for *GRN* carriers with CDR total score of 0.** For the *GRN* carriers with CDR = 0, maps show regions of increasing connectivity with age compared to HC in left-seeded (yellow) and right-seeded (red) ICNs, especially within the thalamus. For the nfvPPA network, there were left-seeded (green) connectivity decreases with age. Analyses were thresholded using joint probability distribution thresholding with a joint height and extent threshold of  $p < 0.05$  corrected for multiple comparisons. Color bars represent t- scores, and statistical maps are on the Montreal Neurological Institute template brain. The left side of the axial and coronal images corresponds to the left side of the brain.

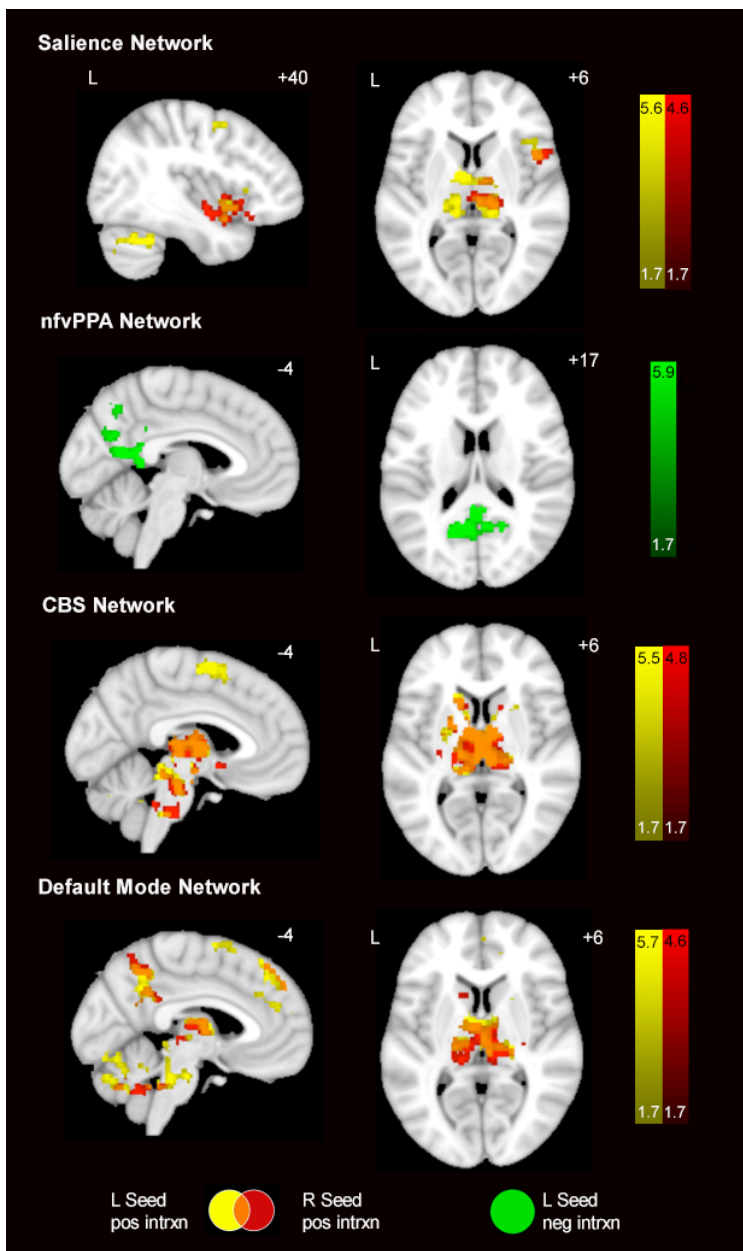

**Fig. S5. Atrophy-adjusted comparisons of thalamic connectivity in presymptomatic and symptomatic *GRN* carriers.** Mean WBD/gray matter w-scores extracted from the thalamic preclinical *GRN* > HC difference map in Fig. 4A, shows WBD hyperconnectivity in preclinical *GRN* with CDR = 0 and preclinical *GRN* with CDR = 0.5 and reduced connectivity in symptomatic *GRN* carriers. Error bars show 1 SEM.

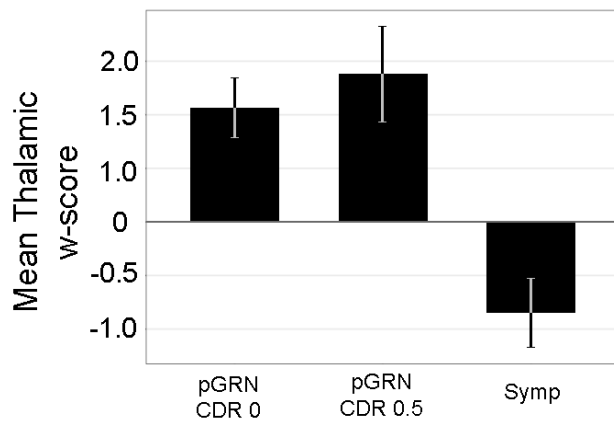

**Fig. S6. Increased whole brain degree connectivity for *GRN* carriers with CDR total score of 0.** Group difference map of *GRN* carriers with CDR 0 vs. HC demonstrates increases in WBD centrality. Analyses were thresholded using joint probability distribution thresholding with a joint height and extent threshold of  $p < 0.05$  corrected for multiple comparisons. Color bars represent t- scores, and statistical maps are on the Montreal Neurological Institute template brain. The left side of the axial and coronal images corresponds to the left side of the brain.

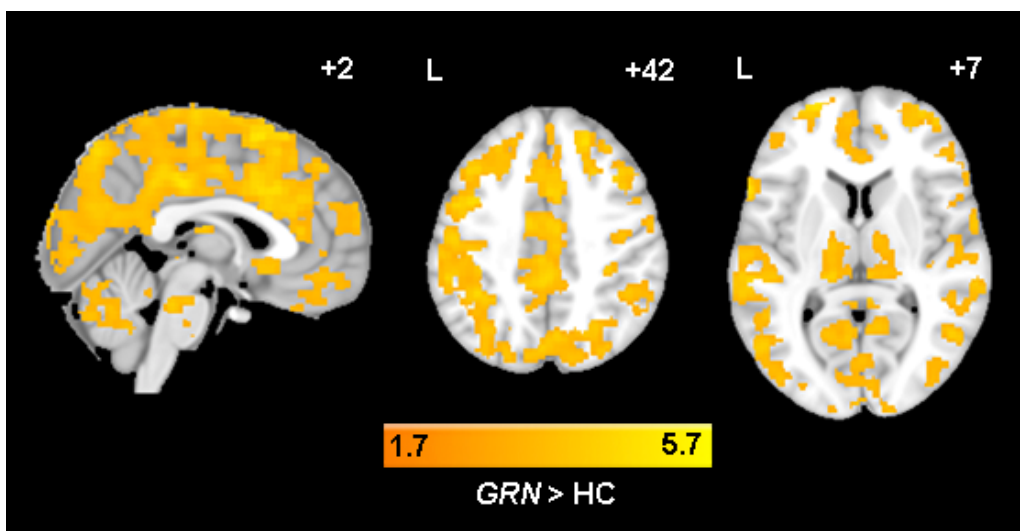

**Fig. S7. Higher neuropsychiatric symptoms and depression scores correlate with lower salience network connectivity for *GRN* carriers with CDR total score of 0.** (A) NPI and (B) GDS total scores correlated with reduced salience network connectivity in *GRN* carriers with CDR total score of 0. Weaker connectivity of the left (yellow) and the right (red) frontoinsula seeds to the voxels shown predicted greater (A) neuropsychiatric symptom severity and (B) depression severity. Results are displayed at a joint cluster and extent probability threshold of  $p < 0.05$ , corrected for multiple comparisons. Color bars represent t- scores, and statistical maps are on the Montreal Neurological Institute template brain. The left side of the axial and coronal images corresponds to the left side of the brain.

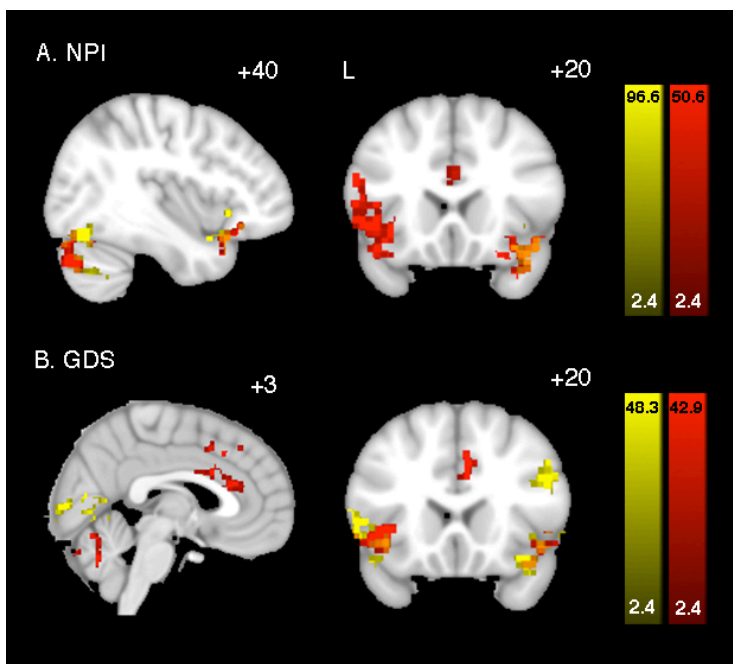

**Fig. S8. Mean connectivity values with the thresholded preclinical GRN vs. HC maps.** We extracted the mean connectivity beta value within the thresholded preclinical GRN vs. HC maps from Figure 2 and plotted each subject's connectivity vs. age. Age axis labels are omitted to prevent unwanted disclosure of genetic information to participants. Preclinical GRN with CDR = 0 are depicted as blue circles, preclinical GRN with CDR = 0.5 as blue dots, and HC as black circles. Fit lines are shown for visualization purposes only.

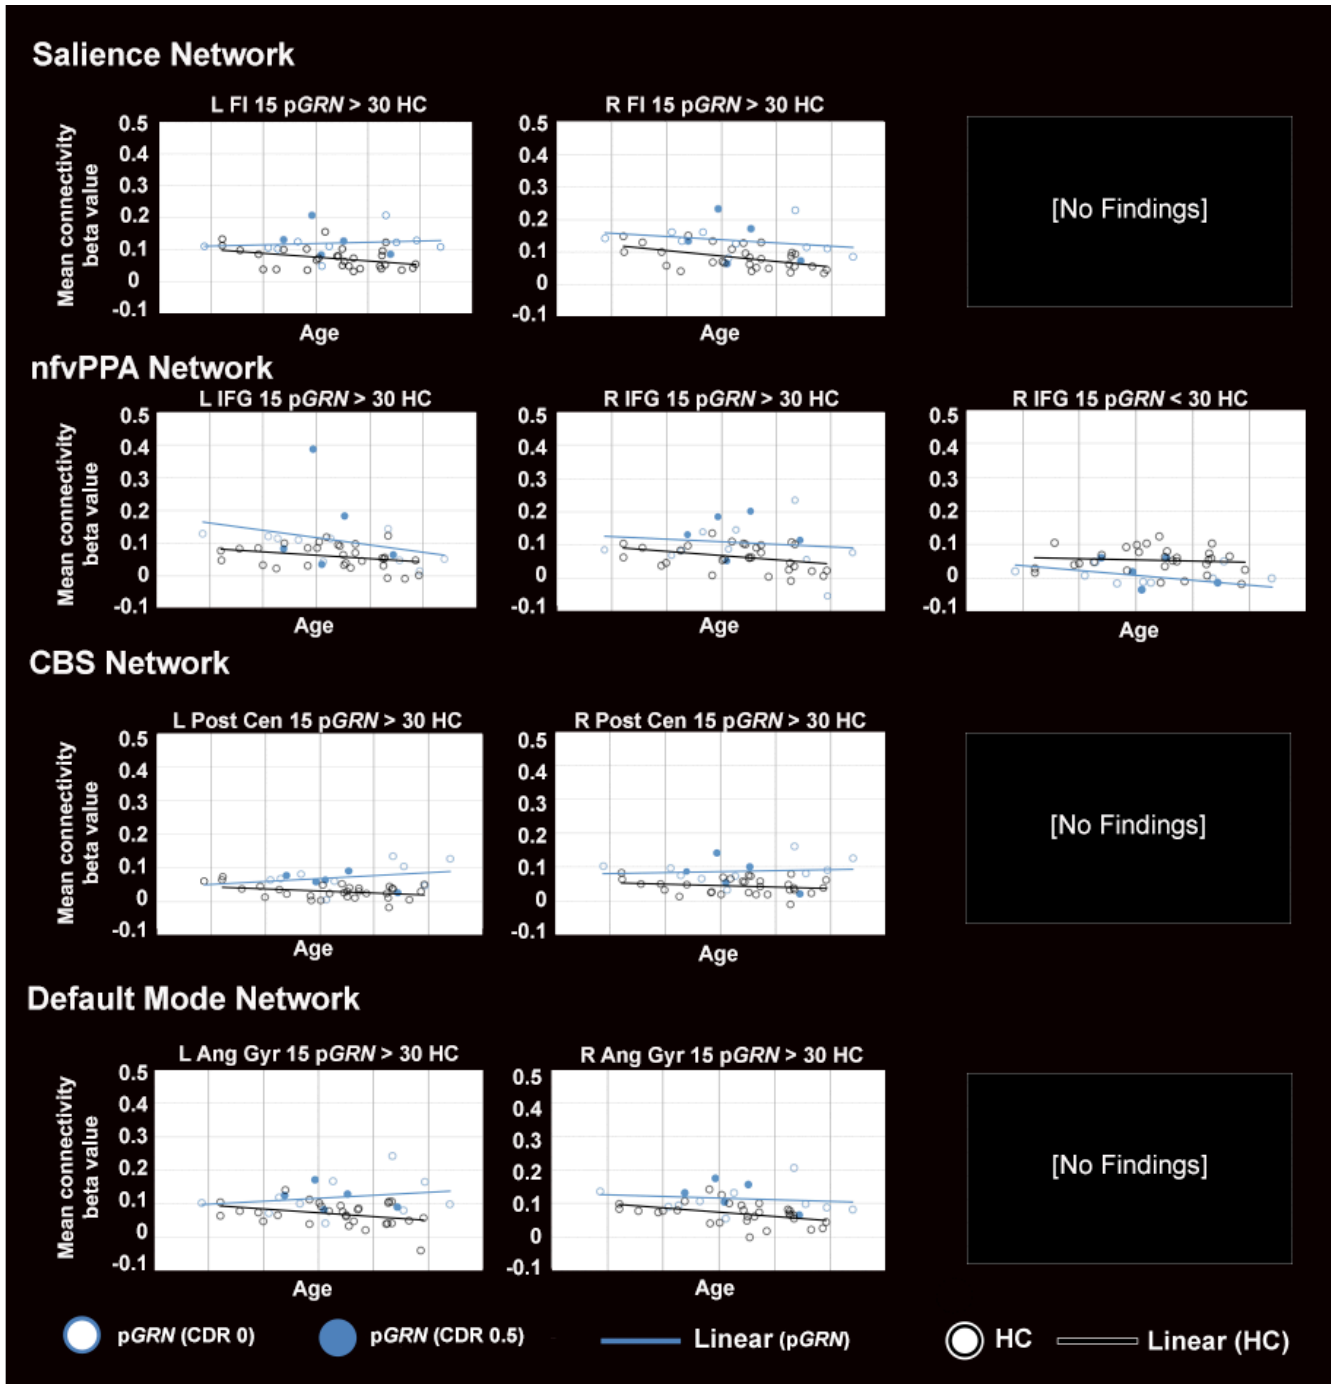

**Table S1.** Demographic comparison of *GRN* and HC for task-free fMRI analyses

|                                              | <b>Healthy<br/>controls<br/>(n = 30)</b> | <b><i>GRN</i><br/>carriers<br/>(n = 15)</b> | <b>Test statistic, df</b> | <b>p</b> |
|----------------------------------------------|------------------------------------------|---------------------------------------------|---------------------------|----------|
| M:F, <i>n</i>                                | 14:16                                    | 6:9                                         | $\chi^2 = 0.01, 1$        | 0.92     |
| Handedness, L:R                              | 6:24                                     | 3:12                                        | $\chi^2 = 0.0, 1$         | 1.00     |
| Age at MRI scan, years                       | 53.3 (10.4)                              | 53.3 (12.2)                                 | t = -0.01, 24.5           | 0.99     |
| Mean root-mean-square,<br>translation (mm)   | 0.152 (0.088)                            | 0.169 (0.127)                               | W = 229                   | 0.93     |
| Mean root-mean-square,<br>rotation (degrees) | 0.063 (0.031)                            | 0.088 (0.067)                               | W = 255                   | 0.48     |

**Table S2.** Clinical and demographic characteristics of symptomatic *GRN* carriers

|                        | <b>8 symptomatic<br/><i>GRN</i> carriers</b> |
|------------------------|----------------------------------------------|
| M:F, <i>n</i>          | 4:4                                          |
| Handedness, L:R:A      | 0:8:0                                        |
| Age at MRI scan, years | 60.1 (6.2)                                   |
| Education, years       | 16.5 (3.0)                                   |



|                           |            |
|---------------------------|------------|
| Disease duration, years   | 2.0 (0.8)  |
| MMSE                      | 23.3 (5.9) |
| CDR total (median, range) | 1 (0-2)    |
| CDR, sum of boxes         | 5.3 (3.2)  |

**Table S3.** Demographic characteristics of gray matter w-score healthy controls

|                        | <b>HC2</b>  |
|------------------------|-------------|
| M:F, <i>n</i>          | 116:172     |
| Handedness, L:R:A      | 35:250:3    |
| Age at MRI scan, years | 66.3 (10.9) |
| Education, years       | 17.3 (2.2)  |

**Table S4.** Demographic characteristics of ICN w-score healthy controls

|                        | <b>HC3</b>  |
|------------------------|-------------|
| M:F, <i>n</i>          | 64:101      |
| Handedness, L:R:A      | 23:140:2    |
| Age at MRI scan, years | 66.8 (11.5) |
| Education, years       | 17.4 (2.2)  |

|                                           |             |
|-------------------------------------------|-------------|
| Mean root-mean-square, translation (mm)   | 0.23 (0.10) |
| Mean root-mean-square, rotation (degrees) | 0.13 (0.06) |

**Table S5.** Demographics and Neuropsychological Testing of *GRN* carriers with CDR total = 0

|                                         | <b>Healthy controls<br/>(HC, n = 30)</b> | <b>Preclinical <i>GRN</i><br/>carriers<br/>(n = 11)</b> | <b>Test Statistic,<br/>df</b> | <b>p</b>    |
|-----------------------------------------|------------------------------------------|---------------------------------------------------------|-------------------------------|-------------|
| M:F, n                                  | 14:16                                    | 3:8                                                     | X = 1.2                       | 0.26        |
| Handedness, L:R:A                       | 6:24:0                                   | 2:9:0                                                   | X = 0.02                      | 0.90        |
| Age at MRI scan, years                  | 53.3 (10.4)                              | 53.7 (13.6)                                             | T = -0.08, 15                 | 0.94        |
| Education, years                        | 16.0 (2.1)                               | 16.7 (3.1)                                              | T = -0.07, 14                 | 0.51        |
| CDR, sum of boxes                       | 0 (0)                                    | 0.1 (0.2)                                               | W = 120                       | <b>0.01</b> |
| Mini-Mental State Exam (max = 30)       | 29.2 (0.9)                               | 28.3 (1.0)                                              | W = 248                       | <b>0.01</b> |
| Stroop, color naming trial              | 96.1 (16.4)                              | 83.3 (17.9)                                             | T = 1.8, 10                   | 0.10        |
| NPI frequency x severity (max = 144)    | 4.1 (5.7)                                | 6.0 (6.3)                                               | W = 57.5                      | 0.22        |
| Geriatric Depression Scale (max = 30)   | 2.5 (2.4)                                | 3.5 (2.7)                                               | W = 97.5                      | 0.20        |
| Interpersonal Reactivity Index, fantasy | 19.5 (6.7)                               | 15.0 (4.9)                                              | T = 1.9, 15                   | 0.08        |

|                                                    |            |            |              |              |
|----------------------------------------------------|------------|------------|--------------|--------------|
| Interpersonal Reactivity Index, empathic concern   | 28.6 (3.5) | 33.0 (2.4) | W = 16       | <b>0.01</b>  |
| Interpersonal Reactivity Index, perspective taking | 24.2 (6.0) | 30.5 (3.0) | T = -3.3, 18 | <b>0.003</b> |
| Interpersonal Reactivity Index, personal distress  | 11.7 (3.9) | 11.1 (3.1) | W = 72.5     | 0.75         |

**Table S6.** VBM of 17 preclinical *GRN* vs. 30 HC

| Contrast        | Region containing peak voxel    | BA | x,y,z      | Peak T | Size | 17 <i>GRN</i> | 11 <i>GRN</i> with<br>CDR 0 |
|-----------------|---------------------------------|----|------------|--------|------|---------------|-----------------------------|
| <i>GRN</i> < HC | L Cingulate Gyrus               | 23 | -2,-4,33   | 5.62   | 479  | X             |                             |
|                 | R Superior Parietal Lobule      | 7  | 14,-70,57  | 5.23   | 94   |               | X                           |
|                 | L Lingual Gyrus                 | 18 | -9,-57,-3  | 4.56   | 67   |               | X                           |
|                 | R Supplementary Motor Area      | 6  | 9,0,66     | 4.50   | 31   |               | X                           |
|                 | R Medial Superior Frontal Gyrus | 9  | 9,48,45    | 4.39   | 63   | X             |                             |
|                 | L Middle Temporal Gyrus         | 37 | -51,-57,12 | 4.26   | 58   | X             |                             |
|                 | R Insula                        | 48 | 48,4,3     | 4.16   | 75   | X             | X                           |
|                 | R Middle Temporal Gyrus         | 21 | 68,-28,-8  | 4.12   | 94   | X             |                             |
|                 | L Supramarginal Gyrus           | 3  | -57,-24,44 | 4.11   | 81   | X             |                             |
|                 | L Thalamus                      | NA | -3,-8,9    | 4.11   | 213  | X             | X                           |
|                 | L Supramarginal Gyrus           | 48 | -63,-45,26 | 4.02   | 79   | X             |                             |

|  |                                                |    |            |      |     |   |   |
|--|------------------------------------------------|----|------------|------|-----|---|---|
|  | R Inferior Frontal Gyrus, Pars<br>Opercularis  | 44 | 44,15,36   | 4.01 | 41  | X |   |
|  | L Cuneus Cortex                                | 18 | -16,-69,26 | 3.99 | 99  | X |   |
|  | L Superior Frontal Gyrus                       | 10 | -22,60,18  | 3.99 | 53  | X |   |
|  | L Inferior Frontal Gyrus, Pars<br>Triangularis | 45 | -54,22,3   | 3.96 | 108 | X |   |
|  | R Superior Temporal Gyrus                      | 22 | 64,-15,12  | 3.96 | 27  |   | X |
|  | L Gyrus Rectus                                 | 11 | -6,62,-18  | 3.95 | 48  | X |   |
|  | R Cuneus Cortex                                | 7  | 9,-72,36   | 3.94 | 43  | X |   |
|  | L Inferior Frontal Gyrus, Pars<br>Triangularis | 45 | -44,46,10  | 3.93 | 53  | X |   |
|  | R Superior Parietal Lobule                     | 5  | 14,-57,68  | 3.92 | 39  |   | X |
|  | R Insula                                       | 48 | 34,9,4     | 3.86 | 43  | X | X |
|  | R Midcingulate Cortex                          | 23 | 0,-4,32    | 3.86 | 37  |   | X |
|  | L Superior Frontal Gyrus, Pars<br>Orbitalis    | 11 | -24,56,-4  | 3.84 | 21  | X |   |
|  | R Superior Frontal Gyrus, Pars<br>Orbitalis    | 47 | 48,39,-14  | 3.81 | 27  | X |   |
|  | L Precuneus                                    | 7  | -14,-69,63 | 3.81 | 55  | X |   |
|  | L Precentral Gyrus                             | 44 | -40,12,42  | 3.80 | 26  | X | X |

|                 |                                               |    |            |      |    |   |   |
|-----------------|-----------------------------------------------|----|------------|------|----|---|---|
|                 | L Insula                                      | 48 | -46,14,-8  | 3.73 | 45 | X | X |
|                 | L Middle Temporal Gyrus                       | 39 | -51,-69,22 | 3.69 | 23 | X |   |
|                 | L Middle Temporal Gyrus                       | 21 | -52,9,-24  | 3.68 | 42 | X |   |
|                 | L Fusiform Gyrus                              | 37 | -27,-51,-8 | 3.68 | 20 |   | X |
|                 | L Middle Frontal Gyrus, Pars<br>Orbitalis     | 46 | -45,51,-9  | 3.63 | 40 | X |   |
|                 | R Inferior Frontal Gyrus, Pars<br>Opercularis | 48 | 52,14,9    | 3.61 | 33 | X |   |
| <i>GRN</i> > HC | R Pons                                        | -- | -9,-34,-38 | 4.55 | 59 | X | X |

**Table S7.** 15 preclinical *GRN* vs. 30 HC ICN comparisons with and without atrophy adjustment

| <b>Contrast</b>         | <b>Region containing peak voxel</b> | <b>BA</b> | <b>x,y,z</b> | <b>Peak T</b> | <b>Size</b> | <b>Unadjusted</b> | <b>Atrophy<br/>Adjusted</b> |
|-------------------------|-------------------------------------|-----------|--------------|---------------|-------------|-------------------|-----------------------------|
| <b>Salience Network</b> | L Mid Cingulate Cortex              | 24        | 0,14,38      | 4.90          | 3759        |                   | X                           |
| <i>GRN</i> > HC         | L Heschl's Gyrus                    | 48        | -40,-24,8    | 4.74          | 203         |                   | X                           |
|                         | R Supplementary Motor Area          | 8         | 8,20,60      | 4.56          | 2104        | X                 |                             |
|                         | L Superior Frontal Gyrus            | 8         | -20,16,52    | 4.55          | 329         |                   | X                           |
|                         | L Mid Cingulate Cortex              | 23        | -4,-28,34    | 4.47          | 2422        | X                 | X                           |
|                         | L Medial Frontal Gyrus              | 32        | -6,40,36     | 4.40          | 594         | X                 |                             |

|                       |                                                |    |             |      |      |   |   |
|-----------------------|------------------------------------------------|----|-------------|------|------|---|---|
|                       | L Thalamus                                     | -- | -4,-16,16   | 4.33 | 865  |   | X |
|                       | L Cerebellar Lobule VI                         | 37 | -32,-34,-32 | 4.29 | 303  |   | X |
|                       | L Heschl's Gyrus                               | 48 | -40,-22,8   | 4.25 | 372  |   | X |
|                       | R Inferior Frontal Gyrus, Pars<br>Triangularis | 45 | 50,30,4     | 4.13 | 966  |   | X |
|                       | L Thalamus                                     | -- | -2,-14,14   | 3.87 | 878  |   | X |
|                       | L Inferior Parietal Lobule                     | 40 | -42,-44,46  | 3.82 | 224  |   | X |
|                       | R Parahippocampal Gyrus                        | 20 | 28,-14,-24  | 3.79 | 213  |   | X |
|                       | R Thalamus                                     | -- | 10,-28,14   | 3.76 | 512  | X |   |
|                       | R Inferior Frontal Gyrus, Pars<br>Triangularis | 45 | 54,30,4     | 3.56 | 692  | X | X |
|                       | R Cerebellar Lobule VI                         | 37 | 26,-56,-18  | 3.52 | 501  | X | X |
|                       | R Cerebellar Hemisphere Crus 1                 | -- | 38,-56,-36  | 3.32 | 920  |   | X |
|                       | L Inferior Frontal Gyrus, Pars<br>Orbitalis    | 47 | -46,36,-6   | 3.23 | 415  | X | X |
|                       | L Superior Temporal Gyrus                      | 22 | -60,-30,10  | 3.13 | 189  |   | X |
|                       | R Putamen                                      | 11 | 22,20,-4    | 2.90 | 267  |   | X |
|                       | L Cerebellar Hemisphere Crus 1                 | -- | -14,-66,-28 | 2.78 | 180  |   | X |
| <b>nfvPPA network</b> | L Medial Frontal Gyrus                         | 32 | -6,42,36    | 4.73 | 1170 |   | X |

|                    |                                                |    |             |      |      |   |   |
|--------------------|------------------------------------------------|----|-------------|------|------|---|---|
| <i>GRN</i> > HC    | L Supplementary Motor Area                     | 8  | -6,24,62    | 3.91 | 703  | X |   |
|                    | R Middle Frontal Gyrus                         | 9  | 40,12,44    | 3.79 | 195  |   | X |
|                    | L Superior Frontal Gyrus                       | 8  | -20,10,58   | 3.69 | 672  |   | X |
|                    | R Middle Frontal Gyrus                         | 44 | 44,22,40    | 3.69 | 569  |   | X |
|                    | R Thalamus                                     | -- | 10,-28,14   | 3.52 | 565  | X | X |
|                    | L Inferior Frontal Gyrus, Pars<br>Triangularis | 45 | -48,34,22   | 3.31 | 480  |   | X |
|                    | L Cerebellar Hemisphere Crus 2                 | -- | -12,-74,-32 | 3.20 | 478  |   | X |
| <i>GRN</i> < HC    | R Cerebellar Lobule III                        | -- | 6,-42,-24   | 3.14 | 596  | X | X |
| <b>CBS network</b> | L Caudate Nucleus                              | 25 | -6,12,-10   | 5.22 | 2588 |   | X |
| <i>GRN</i> > HC    | R Mid Cingulate Cortex                         | 32 | 6,-20,42    | 5.13 | 3993 | X | X |
|                    | L Heschl's Gyrus                               | 48 | -38,-26,10  | 4.92 | 455  | X | X |
|                    | L Caudate Nucleus                              | 25 | -6,14,-10   | 4.63 | 3724 | X |   |
|                    | L Mid Cingulate Cortex                         | 23 | -8,-26,46   | 4.59 | 1975 |   | X |
|                    | R Parahippocampal Gyrus                        | 35 | 4,-22,-24   | 4.51 | 5368 | X | X |
|                    | L Precentral Gyrus                             | 6  | -20,-12,62  | 4.20 | 1723 | X |   |
|                    | L Cerebellar Hemisphere Crus 1                 | -- | -38,-68,-28 | 4.11 | 248  |   | X |
|                    | L Mid Cingulate Cortex                         | 24 | 0,14,38     | 4.11 | 170  |   | X |
|                    | L Postcentral Gyrus                            | 4  | -18,-30,64  | 4.07 | 226  |   | X |

|                    |                                |    |             |      |      |   |   |
|--------------------|--------------------------------|----|-------------|------|------|---|---|
|                    | L Superior Temporal Gyrus      | 42 | -58,-40,14  | 4.04 | 367  | X | X |
|                    | L Parahippocampal Gyrus        | 20 | -32,-22,-24 | 4.04 | 1080 |   | X |
|                    | R Parahippocampal Gyrus        | 20 | 32,-12,-26  | 3.96 | 326  |   | X |
|                    | R Middle Temporal Gyrus        | 21 | 66,-32,-4   | 3.78 | 210  |   | X |
|                    | L Gyrus Rectus                 | 11 | 0,42,-22    | 3.68 | 176  |   | X |
|                    | R Mid Cingulate Cortex         | 23 | 4,-40,34    | 3.66 | 375  |   | X |
|                    | L Cerebellar Hemisphere Crus 1 | -- | -16,-84,-20 | 3.65 | 1242 | X | X |
|                    | R Parahippocampal Gyrus        | 37 | 26,-36,-6   | 3.64 | 356  |   | X |
|                    | R Vermis Lobule IX             | -- | 0,-52,-38   | 3.37 | 402  |   | X |
|                    | R Cerebellar Hemisphere Crus 2 | -- | 42,-44,-42  | 3.26 | 236  |   | X |
|                    | L Cerebellar Lobule IX         | -- | -4,-54,-36  | 3.24 | 369  | X |   |
|                    | R Postcentral Gyrus            | 3  | 42,-16,40   | 3.14 | 171  |   | X |
|                    | R Middle Temporal Gyrus        | 21 | 64,-30,-6   | 3.03 | 221  |   | X |
|                    | R Precentral Gyrus             | 6  | 18,-20,72   | 2.99 | 212  |   | X |
| <b>DMN</b>         | L Mid Cingulate Cortex         | 23 | -4,-34,40   | 6.16 | 6300 |   | X |
| <i>GRN &gt; HC</i> | L Precuneus                    | 7  | 0,-68,40    | 4.71 | 4768 | X |   |
|                    | R Medial Frontal Gyrus         | 8  | 4,30,52     | 4.70 | 4193 | X |   |
|                    | R Superior Frontal Gyrus       | 6  | 16,6,66     | 4.65 | 5355 |   | X |
|                    | L Middle Temporal Gyrus        | 39 | -46,-68,22  | 4.60 | 857  |   | X |



|  |                                             |    |             |      |      |   |   |
|--|---------------------------------------------|----|-------------|------|------|---|---|
|  | R Inferior Temporal Gyrus                   | 20 | 60,-26,-26  | 4.45 | 353  |   | X |
|  | L Middle Frontal Gyrus                      | 44 | -38,26,36   | 4.30 | 356  |   | X |
|  | L Middle Temporal Gyrus                     | 21 | -46,-56,14  | 4.27 | 326  |   | X |
|  | R Cerebellar Hemisphere Crus 1              | -- | 32,-58,-36  | 4.14 | 1944 | X | X |
|  | L Cerebellar Lobule VI                      | -- | -40,-56,-26 | 4.05 | 1857 | X | X |
|  | R Putamen                                   | -- | 22,0,10     | 3.81 | 220  |   | X |
|  | L Putamen                                   | 48 | -22,12,6    | 3.63 | 214  |   | X |
|  | L Inferior Frontal Gyrus, Pars<br>Orbitalis | 47 | -48,30,-6   | 3.57 | 197  |   | X |
|  | L Inferior Parietal Lobule                  | 40 | -38,-54,48  | 3.44 | 249  |   | X |
|  | L Middle Temporal Gyrus                     | 39 | -46,-68,20  | 3.39 | 495  | X |   |
|  | L Cerebellar Hemisphere Crus 1              | -- | -34,-54,-38 | 3.38 | 341  |   | X |
|  | R Parahippocampal Gyrus                     | 20 | 34,-24,-18  | 2.80 | 180  |   | X |
|  | R Parahippocampal Gyrus                     | 20 | 34,-18,-18  | 2.75 | 240  |   | X |

**Table S8.** ICN alterations with 10 preclinical *GRN* subjects (CDR total = 0) vs. 30 HC

| <b>Contrast</b>         | <b>Region containing peak voxel</b> | <b>BA</b> | <b>x,y,z</b> | <b>Peak T</b> | <b>Size</b> |
|-------------------------|-------------------------------------|-----------|--------------|---------------|-------------|
| <b>Salience Network</b> | L Mid Cingulate Cortex              | 24        | 0,12,34      | 4.54          | 1144        |
| <i>GRN</i> > HC         | L Anterior Cingulate Cortex         | 24        | -4,26,28     | 4.53          | 1607        |

|                       |                                             |    |             |      |      |
|-----------------------|---------------------------------------------|----|-------------|------|------|
|                       | Pons                                        | -- | 14,-28,-30  | 4.25 | 721  |
|                       | R Inferior Temporal Gyrus                   | 37 | 50,-62,-14  | 3.95 | 3296 |
|                       | R Inferior Frontal Gyrus, Pars<br>Orbitalis | 47 | 54,34,-8    | 3.62 | 623  |
|                       | L Thalamus                                  | -- | -14,-32,8   | 3.40 | 937  |
|                       | R Lingual Gyrus                             | 27 | 10,-36,2    | 3.29 | 898  |
|                       | L Superior Temporal Gyrus                   | 41 | -48,-30,12  | 3.19 | 328  |
|                       | R Lingual Gyrus                             | 37 | 30,-46,-6   | 3.16 | 385  |
| <b>nfvPPA network</b> |                                             |    |             |      |      |
| <i>GRN &gt; HC</i>    | L Parahippocampal Gyrus                     | 35 | -20,-16,-22 | 3.78 | 359  |
| <b>CBS network</b>    | R Mid Cingulate Cortex                      | 24 | 0,14,32     | 5.41 | 4957 |
| <i>GRN &gt; HC</i>    | L Mid Cingulate Cortex                      | 24 | 0,14,36     | 4.62 | 3265 |
|                       | R Cerebellar Lobule XIII                    | -- | 32,-42,-40  | 4.47 | 594  |
|                       | L Thalamus                                  | -- | -14,-22,10  | 4.11 | 2196 |
|                       | L Superior Temporal Gyrus                   | 41 | -48,-30,10  | 4.06 | 359  |
|                       | Pons                                        | -- | 2,-24,-24   | 4.00 | 4180 |
|                       | Pons                                        | -- | 14,-28,-28  | 4.00 | 2104 |
|                       | R Putamen                                   | -- | 32,-2,-4    | 3.65 | 331  |
| <b>DMN</b>            | R Superior Frontal Gyrus                    | 8  | 20,24,58    | 5.10 | 5628 |

|                 |                                |    |            |      |      |
|-----------------|--------------------------------|----|------------|------|------|
| <i>GRN</i> > HC | R Mid Cingulate Cortex         | 23 | 14,-48,34  | 5.03 | 2983 |
|                 | R Cerebellar Hemisphere Crus 1 | 37 | 44,-48,-26 | 4.49 | 2471 |
|                 | L Middle Temporal Gyrus        | 21 | -46,-56,16 | 4.38 | 449  |
|                 | R Medial Frontal Gyrus         | 9  | 8,48,46    | 4.20 | 852  |
|                 | R Cerebellar Hemisphere Crus 1 | 37 | 46,-50,-26 | 4.03 | 1346 |
|                 | L Middle Temporal Gyrus        | 39 | -44,-68,20 | 3.96 | 407  |
|                 | R Parahippocampal Gyrus        | 20 | 32,-26,-18 | 3.86 | 473  |

**Table S9.** Interaction of group and age on ICN connectivity for 15 preclinical *GRN* vs. 30 HC

| <b>Contrast</b>                                                 | <b>Region containing peak voxel</b>        | <b>BA</b> | <b>x,y,z</b> | <b>Peak T</b> | <b>Size</b> |
|-----------------------------------------------------------------|--------------------------------------------|-----------|--------------|---------------|-------------|
| Regions where preclinical <i>GRN</i> show SN increases with age | R Inferior Frontal Gyrus, Pars Opercularis | 48        | 48,10,8      | 4.74          | 856         |
|                                                                 | R Cerebellar Lobules IV, V                 | 37        | 20,-42,-22   | 4.21          | 3076        |
|                                                                 | R Thalamus                                 | --        | 8,-8,10      | 4.04          | 1248        |
|                                                                 | R Middle Frontal Gyrus                     | 46        | 38,36,36     | 3.90          | 384         |
|                                                                 | R Cerebellar Lobule VI                     | 18        | 16,-68,-18   | 3.83          | 1436        |
|                                                                 | R Inferior Frontal Gyrus, Pars Opercularis | 44        | 54,14,22     | 3.64          | 648         |
|                                                                 | R Thalamus                                 | --        | 16,-6,12     | 3.61          | 370         |

|                                   |                                   |    |            |      |      |
|-----------------------------------|-----------------------------------|----|------------|------|------|
| nfvPPA network decreases with age | R Lingual Gyrus                   | 27 | 8,-44,4    | 5.05 | 1264 |
| CBS network increases with age    | L Cerebellar Lobules IV, V        | 27 | -8,-34,-10 | 4.93 | 2884 |
|                                   | Thalamus                          | -- | 0,-10,-2   | 4.33 | 2260 |
|                                   | L Supplementary Motor Area        | 6  | -6,-4,64   | 3.95 | 465  |
|                                   | R Cerebellar Hemisphere Crus<br>1 | -- | 42,-62,-32 | 3.68 | 384  |
| CBS network decreases with age    | R Cerebellar Hemisphere Crus<br>1 | -- | 36,-78,-22 | 4.21 | 348  |
|                                   | R Precuneus                       | 30 | 2,-50,18   | 3.52 | 347  |
| DMN increases with age            | R Medial Frontal Gyrus            | 10 | 6,60,28    | 4.28 | 429  |
|                                   | R Thalamus                        | -- | 8,-6,10    | 4.20 | 1312 |
|                                   | R Cerebellar Lobule VI            | 18 | 16,-68,-18 | 3.93 | 3339 |
|                                   | R Thalamus                        | -- | 6,-6,12    | 3.65 | 1274 |
|                                   | L Cerebellar Lobule VIIB          | -- | -8,-72,-38 | 3.41 | 407  |
|                                   | R Cerebellar Lobule IX            | -- | 4,-56,-40  | 3.02 | 453  |

**Table S10.** Whole brain degree connectivity in preclinical *GRN* vs. 30 HC

| <b>Contrast</b> | <b>Region containing peak voxel</b> | <b>BA</b> | <b>x,y,z</b> | <b>Peak T</b> | <b>Size</b> | <b>With CDR 0.5</b> | <b>Without CDR<br/>0.5</b> |
|-----------------|-------------------------------------|-----------|--------------|---------------|-------------|---------------------|----------------------------|
| <i>GRN</i> > HC | L Middle Frontal Gyrus              | 9         | -34,16,52    | 5.6           | 26460       | X                   | X                          |
|                 | R Middle Temporal Gyrus             | 20        | 60,-38,-10   | 4.23          | 750         | X                   |                            |
|                 | R Thalamus                          | --        | 10,-24,16    | 3.76          | 1102        | X                   |                            |
